# Supplementary material for: Development of a Novel Electrochemical Sensor for Determination of Matrine in Sophora flavescens
Source: MDPI journal article supplement (doi:10.3390/molecules22040575), 2017-04-01

## Development a novel electrochemical sensor for determination of matrine in *Sophora flavescens*

Junping Zhanng<sup>1</sup>, Yanchun Wang<sup>2</sup> and Zheng Wei<sup>1\*</sup>

<sup>1</sup> Department of Oncology, Henan Academy institute of Traditional Chinese Medicine, Zhengzhou, Henan, P. R. China

<sup>2</sup> Department of Traditional Chinese Medicine, Henan Province People's Hospital, Zhengzhou, Henan, P. R. China

\* Correspondence: [weizheng\\_zz@126.com](mailto:weizheng_zz@126.com);

**Figure S1.** CVs of 0.1 mM MT obtained at GNs/HA/GCE at pH conditions from 5.0 to 8.5.

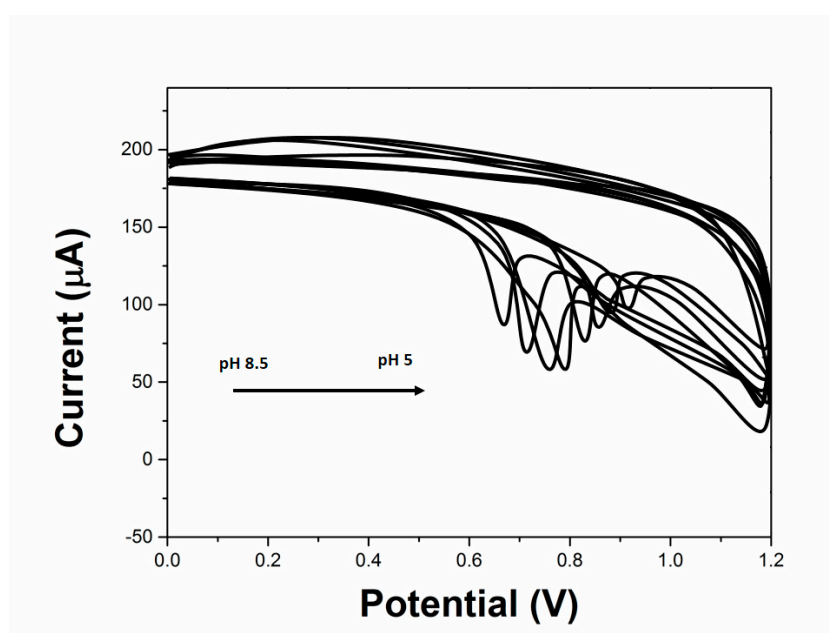

Supplement: s1 [file s1]
